# Supplementary material for: 3D printable tough silicone double networks
Source: PubMed Central journal article supplement (PMC7417997; doi:10.1038/s41467-020-17816-y), 2020-08-10
Supplement: 41467_2020_17816_MOESM2_ESM.pdf [file 41467_2020_17816_MOESM2_ESM.pdf]

**Editorial Note:** This manuscript has been previously reviewed at another journal that is not operating a transparent peer review scheme. This document only contains reviewer comments and rebuttal letters for versions considered at Nature Communications.
