# Supplementary material for: 3D printable tough silicone double networks
Source: PubMed Central journal article supplement (PMC7417997; doi:10.1038/s41467-020-17816-y), 2020-08-10
Supplement: 41467_2020_17816_MOESM3_ESM.pdf [file 41467_2020_17816_MOESM3_ESM.pdf]

## **Description of Additional Supplementary Files**

File Name: Supplementary Movie 1

Description: Stereolithography Printing with SiIDNs

File Name: Supplementary Movie 2

Description: 3D Printed Surgical Simulator

File Name: Supplementary Movie 3

Description: Representative 90° Peel Tests

File Name: Supplementary Movie 4

Description: Steep and Shallow Stiffness Gradients from SiIDNs

File Name: Supplementary Movie 5

Description: 3D Printed Interlocking SiIDN Assemblies

File Name: Supplementary Movie 6

Description: Orthotic Glove with Dexterous Manipulation

File Name: Supplementary Movie 7

Description: Cyclic Donning and Doffing of Orthotic Glove 10 Months after Assembly

File Name: Supplementary Movie 8

Description: Bellows Actuator Attached to Flexible PCB
